# Supplementary material for: Urinary Biomarkers of Oxidative Stress in Aging: Implications for Prediction of Accelerated Biological Age in Prospective Cohort Studies
Source: Oxid Med Cell Longev. 2022 May 6;2022:6110226. doi: 10.1155/2022/6110226 (PMC9106456; doi:10.1155/2022/6110226)
Supplement: Supplementary Materials — Laboratory parameters of human fresh and frozen serum samples and urine samples (n = 198) including urinary oxidative stress parameters. [file 6110226.f1.csv]

ID	Included	Age	Smoking	Sex	kg	m2	BMI	ccUrine	FROZENACARO	FROZENALB	FROZENATOCO	FROZENBCARO	FROZENBCRYPT	FROZENCERU	FROZENCQ10	FROZENCUS	FROZENCYSGLY	FROZENCYST	FROZENDBIL	FROZENDTOCO	FROZENFE	FROZENFERR	FROZENGLU	FROZENGLUTA	FROZENGTOCO	FROZENHCYS	FROZENHYDIS	FROZENLUT	FROZENLYCO	FROZENRETI	FROZENRETPAL	FROZENTBIL	FROZENTIBCC	FROZENTTHIOL	FROZENUIBC	FROZENURIC	FROZENVITC	FROZENZEAX	FRESHABAS	FRESHAEOS	FRESHALB	FRESHALK	FRESHALT	FRESHALYM	FRESHAMON	FRESHANEU	FRESHAST	FRESHBA	FRESHBCR
221	1	21	0	0	50.34875307	2.56064004	19.67	30	45	3.5	8.3	114	99	52	0.6	1764	28	233	0.2	0.02	138	12	76	2	0.9	7.9	7.9	115	242	427	10	0.8	406	271	268	4.6	13	65	0	0.2	3.6	60	15	1.9	0.3	1.5	22	0.6	10
222	1	21	0	0	69.39963261	2.89612324	23	525	66	3.3	14.5	156	74	57	1.5	1190	39	394	0.1	0.1	71	29	68	8.9	2.4	10.3	6	74	324	619	22	0.4	342	452	271	4.7	13	40	0	0.2	4.3	72	20	1.5	0.3	4.8	27	0.5	11
225	1	23	0	0	68.49244787	3.20660649	21	90	52	3.9	7.9	187	94	46	0.5	1479	48	305	0.2	0.04	134	32	75	1.3	1.3	10.7	4.5	138	294	546	14	0.9	343	365	209	4.5	15	55	0	0.1	4.1	51	11	1.9	0.3	2.8	17	0.3	13.3
227	1	20	1	0	68.49244787	2.64257536	25	160	41	2.9	7.2	157	63	36	0.8	789	48	231	0.1	0.11	61	36	63	7.1	1.8	6.3	3.6	52	241	408	9.9999	0.5	254	292	193	3.2	11	23	0	0.3	3.9	58	16	2.1	0.5	6.6	17	0.4	15
228	1	21	0	0	87.99691978	2.922116736	30.14	485	17	3.2	6.2	77	42	34	0.5	620	34	317	0.1	0.07	58	38	70	3.9	1.7	7.2	3.6	42	129	345	16	0.2	271	362	213	2.5	9	19	0	0.3	3.7	48	10	1.7	0.4	3.4	16	0.3	8.6
229	1	21	0	0	64.31939807	2.878858758	22	125	18	2.7	5.6	169	126	39	0.9	822	47	338	0.1	0.08	63	38	59	2.6	2.3	10.1	5.8	43	243	385	9.9999	0.6	218	398	155	2.2	9	34	0	0.2	4.2	72	14	2	0.3	4.2	18	0.6	11.4
230	1	28	0	0	66.22448602	2.44015641	27	410	28	3.1	13.7	50	33	80	1.2	1177	41	309	0.1	0.0099	76	50	58	4	0.2	6.7	9.7	82	255	603	37	0.4	319	361	243	2.8	15	24	0	0.1	3.8	53	17	1.9	0.2	2.8	20	0.3	13.3
234	1	24	0	0	63.5029318	2.464020878	25	300	64	3.1	6.1	150	74	44	0.6	819	36	327	0.1	0.07	108	17	53	5.2	2	8.1	0.9999	68	203	412	14	0.7	222	376	114	3.4	13	29	0	0.1	4.3	104	18	1.7	0.3	1.9	18	0.4	22.9
235	1	22	0	0	50.34875307	2.56064004	19.66	45	90	3.3	6.8	195	66	36	0.5	743	30	189	0.1	0.02	92	38	64	6	1	5.6	0.9999	54	100	269	21	0.8	238	231	146	3.3	11	28	0	0	4.2	50	12	1.2	0.2	2.9	16	0.5	15
237	1	22	0	0	54.4310844	2.725801	19.93	400	37	4	6.6	115	86	30	0.7	1292	33	265	0.2	0.08	69	9	82	3.3	1.5	6.6	3.9	56	109	357	9.9999	0.6	392	308	323	3.8	15	26	0	0.1	3.8	57	14	1.7	0.4	3.9	27	0.5	17.5
238	0	25	1	0	82.91668524	3.009600432	27	250	27	4.1	6.3	131	51	35	0.4	1566	39	284	0.0999	0.07	83	24	79	6.1	2.5	7.1	3.2	33	163	394	9.9999	0.6	311	336	228	3.6	13	20	0	0.1	4.3	35	13	2.4	0.1	4.7	19	0.3	12.9
239	1	26	0	0	63.95652417	2.56064004	24	315	50	3.9	7.2	153	60	88	0.8	2531	54	359	0.1	0.09	88	50	90	9.4	1.5	11.2	10.1	104	176	515	13	0.5	367	434	279	3	16	43	0	0.1	4	50	15	1.8	0.3	3.3	17	0.7	14.4
241	0	27	0	0	51.02914163	2.44015641	20	250	32	3.5	9.1	313	137	30	0.4	562	32	362	0.1	0.01	74	33	64	4.4	0.5	4.5	3.6	130	175	300	13	0.5	224	403	150	2.4	14	44	0	0.1	4.2	43	19	2.1	0.4	2.2	25	0.4	21.7
243	1	27	0	0	65.77089365	2.56064004	25	150	19	3.7	10.7	63	47	63	0.8	1838	35	317	0.1	0.08	161	29	85	5.1	1.6	6	7.6	81	226	522	19	0.4	414	363	253	3.9	13	35	0	0.2	3.9	45	21	2.8	0.8	10.7	26	0.2	14.3
244	0	24	0	0	69.39963261	2.89612324	23	625	60	4	7.1	103	121	68	0.6	2644	30	290	0.1	0.01	95	11	75	4.8	0.4	8.6	6.6	83	179	561	17	0.4	414	333	319	4.3	13	41	0	0.1	3.8	46	15	1.8	0.4	4	15	0.4	10
245	1	28	0	0	84.36818082	2.98321984	28	175	69	4.2	9.3	526	177	32	0.6	1354	34	309	0.1	0.01	167	18	81	4.3	0.7	8	6.3	111	165	442	14	0.8	306	355	139	4.4	17	57	0	0	3.5	52	136	1.7	0.5	5	200	0.4	10
248	1	24	0	0	62.59574706	2.725801	22	400	8	3	9.5	36	36	67	0.9	1201	41	320	0.1	0.04	166	37	60	5.9	1.5	9.5	8.7	71	158	608	12	0.9	287	376	121	2.9	11	35	0	0.1	5	51	20	2.2	0.5	3.9	21	0.7	15
249	1	22	0	0	55.79186151	2.60144641	21	200	47	4.2	7.6	163	83	37	0.7	1221	38	258	0.0999	0.1	63	11	79	8.8	2.3	7.5	4.3	99	138	343	14	0.4	417	312	354	2.9	12	47	0	0.1	4.2	105	15	2.2	0.4	3.8	19	0.3	11.3
267	1	21	0	1	81.19303423	3.009600432	26	200	11	3.5	9.7	93	74	54	1.2	1096	77	361	0.1	0.29	39	93	66	4.5	4.6	6.8	4.5	52	231	408	21	0.4	241	449	197	5.1	9	45	0	0.2	3.7	160	48	1.9	0.5	4.8	37	0.6	8.9
268	1	22	0	1	74.38914868	3.25225156	22	75	17	4.1	7.3	56	39	35	0.8	696	63	284	0.1	0.12	62	33	87	7.4	2.4	8.9	3.9	69	218	362	12	0.7	285	363	223	6.3	7	28	0	0.1	4.5	64	16	1.5	0.5	3.9	22	0.4	13
270	1	24	0	1	86.1825503	2.98321984	28	550	27	4.2	7.1	108	113	39	1	856	31	293	0.1	0.1	150	122	82	12.2	2.5	10.5	2.1	81	159	376	14	0.9	277	347	127	4.5	14	48	0	0	4.6	75	18	1.4	0.4	2.4	25	0.6	11.3
275	0	28	1	1	84.36818082	2.85305881	29	200	44	4.2	16.8	178	86	34	2.3	943	53	318	0.0999	0.15	105	200	100	2.9	3.6	8.3	4.5	152	302	510	16	0.5	312	382	207	6.7	8	77	0	0.2	4.3	53	81	2.6	0.6	4.3	47	0.3	13
277	1	23	0	1	79.83225712	3.161284	25	900	100	2.8	8.4	294	104	30	1.3	708	69	348	0.2	0.06	61	57	46	7.4	1	10.8	5	103	203	593	18	0.8	135	435	74	3.3	9	81	0	0.1	4.4	70	18	1.5	0.5	2.6	28	0.3	13.3
279	1	26	0	1	81.6466266	2.98321984	27	300	14	4.5	7.1	62	122	37	0.9	1535	44	262	0.1	0.03	101	122	85	4.9	1.2	7.6	5.1	61	130	448	17	0.6	351	319	250	5.4	11	66	0	0.5	4.6	82	28	1.4	0.7	7.7	22	0.4	13.8
281	1	27	1	1	83.46099608	3.143245326	26	375	11	3.7	12.6	41	79	50	1.7	1042	34	461	0.2	0.06	82	162	66	7.3	1.9	16	3.7	63	236	758	9.9999	1.3	287	518	205	5.3	10	39	0	0.2	4.3	63	36	3.1	0.3	2.7	30	0.3	7
282	0	25	1	1	75.74992579	3.39112225	22	100	12	4	7	55	69	30	0.8	1046	33	398	0.1	0.06	134	79	94	4.1	1.8	11.6	4.4	53	208	378	22	0.8	254	447	120	4.4	8	37	0	0.1	4	63	21	2.1	0.4	2	19	0.6	14
284	1	24	0	1	70.76040972	3.25225156	21	90	15	3.8	4.3	79	32	30	0.4	675	34	242	0.1	0.02	107	62	75	3.8	1.1	5.8	4.1	28	89	337	9.9999	0.5	248	286	141	4.8	9	16	0	0.2	4.2	63	12	1.6	0.3	2.6	17	0.1	13.3
285	1	21	0	1	75.74992579	3.161284	23	225	8	3.7	11.6	51	68	41	1.5	818	62	268	0.1	0.11	95	109	71	3	3	6	10.7	71	352	584	21	0.6	274	339	179	5.2	10	42	0	0.2	4.2	52	31	1.7	0.4	2	22	1	11
287	1	27	0	1	83.00740371	2.89612324	28	0	16	3	7	59	53	29	1	915	55	270	0.1	0.23	82	31	72	8.4	3.7	8.9	3.9	28	77	683	31	0.5	205	342	123	5.5	11	17	0	0.1	3.4	34	17	2	0.5	3.5	18	0.3	6
289	1	26	0	1	96.61517481	3.34450944	28	350	24	3.8	10.2	215	70	37	0.8	935	66	523	0.1	0.04	95	124	64	8.4	1.5	11.7	5.9	67	293	458	14	0.5	240	609	145	5.8	12	39	0	0.1	4.5	73	47	1.9	0.5	2.5	34	0.5	14.4
290	1	21	1	1	68.0388555	3.02725201	22	325	20	3	6.1	93	89	29	0.6	721	52	329	0.0999	0.08	30	21	67	11.1	2.2	8.7	0.9999	70	135	366	13	0.3	211	401	181	4.8	13	37	0	0.2	4.1	77	24	1.6	0.4	2.8	34	0.5	12
291	1	26	1	1	87.54332741	3.29821921	26	170	19	4.6	11.2	147	92	34	0.6	1142	52	325	0.0999	0.13	63	102	76	5.2	1.8	7.1	3	141	143	449	18	0.6	271	389	208	3.9	14	62	0	0.1	4.8	55	30	1.5	0.6	3	38	0.4	18.3
293	0	25	0	1	78.92507238	3.07160676	25	300	45	4.6	10.2	138	77	32	1.4	823	33	290	0.0999	0.11	100	160	86	2.8	2.3	7.2	4.5	95	216	609	15	0.8	334	333	234	5.2	11	50	0	0.1	4.6	73	55	1.6	0.4	3.3	34	0	13.6
297	0	25	0	1	87.08973504	3.53289616	24	600	64	4.7	16.5	910	97	33	0.7	1306	35	443	0.1	0.01	77	62	84	6.2	0.7	10.5	4.4	97	191	488	10	1.5	360	495	283	4.9	15	36	0	0.1	4.7	60	20	1.5	0.4	2.4	26	0.5	12.2
298	0	28	0	1	79.83225712	3.07160676	25	570	54	4.3	10.4	996	73	31	0.5	1319	48	263	0.1	0.03	61	79	91	6.5	0.8	10.6	4.2	36	127	421	17	0.7	265	328	204	3.3	22	46	0	0.2	4.6	53	30	2.8	0.4	2.4	29	0.3	18.9
299	1	21	0	1	71.66759446	3.07160676	23	625	23	4.6	6.9	82	56	26	0.8	712	36	456	0.2	0.05	154	96	85	6.4	1.6	9.7	3.6	54	134	398	13	1.6	343	508	189	7	17	18	0	0.1	4.6	73	22	1.2	0.4	5.2	22	0.5	10.9
328	1	36	1	0	61.68856232	2.922116736	21	1010	492	3.3	14.2	1132	152	42	1	829	44	280	0.2	0.05	59	17	69	7.7	1.8	9.2	3.4	250	114	528	18	0.7	284	341	225	4.2	16	112	0	0.1	3.9	30	21	0.9	0.5	5.1	26	0.4	14
331	1	32	0	0	70.44289506	2.751020304	25	225	94	2.7	8.2	204	79	29	0.9	498	54	315	0.1	0.06	85	32	59	15.9	1.6	8.2	2.9	71	318	364	12	0.7	194	393	109	2.6	12	42	0	0.3	3.9	71	17	2	0.2	2.5	18	0.3	13.8
335	0	32	0	0	62.86790248	2.64257536	23	600	67	4.5	10.9	168	61	52	0.8	1367	54	300	0.1	0.03	38	5	90	7.1	2.1	10.3	8.1	98	315	323	12	0.5	444	371	397	4.2	14	45	0	0.1	3.9	58	13	1.1	0.4	1.6	16	0.1	11.3
336	1	34	0	0	71.21400209	2.384924262	29	250	78	3.3	15.1	299	166	54	2.2	1023	24	224	0.1	0.13	46	24	65	3.1	3.2	5.3	7.1	109	355	343	23	0.6	300	256	254	3.8	7	49	0	0.1	3.9	51	10	2	0.2	3.8	16	0.4	18.6
338	1	31	1	0	81.6466266	2.725801	29	550	58	3.3	12.3	308	54	43	1.4	740	51	329	0.1	0.04	71	19	75	4.6	1.3	8.5	5.2	120	253	420	28	0.6	318	393	247	5.1	13	33	0	0	3.9	50	17	2.4	0.5	3.1	17	0.4	18.8
339	0	37	0	0	79.60546094	2.68402689	29	175	22	2.4	9.1	149	89	64	1.1	1339	43	224	0.0999	0.13	10	3	64	5.6	3	9.9	5.1	149	212	270	11	0.4	293	283	283	2.7	4	85	0	0.1	3.6	59	11	2.3	0.4	2.7	15	0.5	15
340	1	38	0	0	80.73944186	2.709052646	29	225	6.9999	2.7	4.8	22	25	28	0.5	612	56	449	0.1	0.17	60	19	68	3.8	2.7	11.5	1.4	36	53	396	9.9999	0.3	205	520	145	2.6	5	21	0	0.1	3.6	47	10	1.8	0.3	2.6	15	0.4	8.6
344	1	38	0	0	54.4310844	2.47999504	21	450	70	4	12.9	266	125	54	0.9	1792	26	242	0.1	0.02	70	63	81	4.6	0.9	5	5.4	340	130	319	20	0.6	335	278	265	2.8	15	90	0	0.1	4	59	15	1.7	0.3	4.5	21	0.3	11.7
345	0	39	0	0	68.94604024	2.60144641	26	450	37	3.6	10.1	136	80	33	1.1	986	33	335	0.0999	0.02	62	14	72	3.9	2.1	10.2	6	67	263	323	10	0.6	236	382	174	3.7	12	41	0	0	3.9	62	13	1.4	0.2	3.6	18	0.6	13.3
346	1	37	0	0	64.41011654	3.161284	20	53	69	3.4	17.9	726	99	76	1.4	1828	38	297	0.1	0.01	89	12	75	4.8	0.2	10.9	8.8	450	152	394	33	0.4	343	351	254	4	16	152	0	0.1	3.8	57	27	1.4	0.4	4.2	26	0.4	16.3
347	0	30	0	0	81.19303423	2.725801	29	275	24	3.1	9.4	101	95	70	1.1	2237	38	287	0.1	0.05	32	6	90	3.4	1.8	6.6	2.2	77	191	432	9.9999	0.4	398	335	366	4.4	17	45	0	0.1	3.1	42	14	2	0.5	2.8	22	0.4	8.8
348	1	38	0	0	58.9670081	2.52015625	23	700	203	3.4	12.6	820	231	39	0.8	794	47	351	0.1	0.01	62	23	69	8.5	0.8	7.9	4.7	210	238	366	17	0.9	242	414	180	4	18	137	0	0.1	4.6	38	19	1	0.2	2.9	19	0.3	20
349	1	36	0	0	61.68856232	2.725801	22	1010	25	3.1	9.1	90	61	74	0.6	1471	65	394	0.1	0.03	67	17	57	10.5	1.1	13.2	6	74	187	577	9.9999	0.4	301	483	234	3.5	11	28	0	0.1	4	38	19	1.6	0.4	3.6	23	0.6	11.4
374	0	39	0	1	68.4017294	3.29821921	20	925	35	3.5	10.5	333	125	40	1.2	852	59	384	0.2	0.08	79	94	77	8.1	1.6	11.7	5.7	179	113	416	14	0.8	278	463	199	4.5	15	87	0	0.1	4.1	80	16	2.1	0.5	2.7	18	0.2	16.7
377	1	32	0	1	75.74992579	2.81031696	26	100	71	4.4	13.4	143	107	32	1.2	1418	49	253	0.1	0.09	125	91	95	8.4	1.9	6.5	3.9	87	299	471	28	0.7	393	317	268	5.2	14	51	0	0.1	4.3	93	27	1.1	0.4	2.8	24	0.4	13.3
382	1	35	1	1	87.99691978	3.161284	27	725	25	3.9	6.5	109	86	38	0.7	985	70	296	0.1	0.15	71	57	78	6.4	3	6.8	4.3	73	127	393	22	0.5	243	379	172	5.9	9	60	0	0.2	4.1	83	18	3.9	0.5	5.4	25	0.3	15
383	1	37	1	1	99.56352522	3.419244774	29	500	21	3.9	7.3	45	22	44	0.7	1042	45	391	0.2	0.1	63	174	82	7.4	2.2	11.7	4.6	62	157	509	12	1.1	315	455	252	5	12	18	0	0.1	4.4	71	22	1.4	0.2	2.4	17	0.6	12.5
384	1	34	1	1	82.78060753	2.81031696	29	70	29	4	8.3	93	49	32	1.2	934	43	246	0.0999	0.27	69	56	84	4.5	3.5	5.4	4.9	43	382	460	25	0.4	358	299	289	5.4	8	30	0	0.3	3.8	54	38	2.3	0.5	3.5	27	0.4	12
385	1	38	0	1	92.98643585	3.34450944	27	250	80	3.3	11.9	320	134	40	1	391	66	524	0.2	0.05	68	115	71	3.4	1	14	3.8	97	154	637	12	0.9	212	607	144	4.7	12	48	0	0.1	4.2	40	12	2.2	0.3	3.2	18	0.4	14.2
387	0	33	1	1	93.44002822	3.27979344	28	300	27	4.1	9.5	54	40	32	0.7	879	45	308	0.1	0.1	88	56	102	3.9	2.2	7.9	1.2	40	132	427	13	0.7	360	365	272	6.1	12	27	0	0.2	4.1	67	28	1.2	0.5	3.4	26	0.4	9
388	1	32	0	1	83.00740371	3.161284	26	500	94	3.3	9.2	230	67	32	0.5	737	38	303	0.3	0.02	41	35	62	4.7	0.4	9	3.4	135	47	375	13	1.3	281	355	250	4.2	9	43	0	0.1	3.9	63	29	1.6	0.3	3.4	39	0.5	21.8
389	1	34	0	1	82.55381134	3.34450944	24	275	70	4	11.9	532	180	32	1	958	41	358	0.1	0.03	99	85	87	3.4	0.8	8.9	2.9	83	220	538	24	0.9	329	411	230	5.8	13	48	0	0.2	4.1	55	37	1.4	0.4	2.6	34	0.4	25.6
390	1	38	0	1	80.28584949	3.07160676	26	750	22	3.8	8.6	148	113	31	0.9	697	42	171	0.2	0.03	140	37	78	3.7	1.3	7	5.2	129	83	438	10	1.5	284	224	144	6	10	82	0	0.1	5	49	18	1.4	0.4	2.6	20	0.3	10.8
391	1	39	0	1	85.27536556	2.89612324	29	225	7	4	9.5	27	37	30	2.3	906	27	176	0.2	0.17	136	1331	90	1.1	3.7	11.4	2.5	50	136	544	10	0.6	331	216	195	5.3	6	29	0	0	4.2	52	51	0.8	0.2	2.4	86	0.5	6.3
392	1	40	1	1	67.13167076	2.89612324	23	375	55	3.4	9.9	180	107	31	1.1	808	28	157	0.1	0.05	115	134	77	1.9	1.7	6.5	3.2	95	228	707	9.9999	0.6	382	193	267	6.2	9	51	0	0.1	3.6	60	92	2	0.6	2.4	49	0.7	13.6
393	1	38	0	1	64.41011654	2.98321984	21	650	99	3.5	7.8	261	177	30	1.1	710	45	281	0.1	0.02	87	146	76	7.6	1.3	13.6	1.6	98	246	456	10	0.4	228	347	141	4.6	11	49	0	0.1	4.5	67	21	1.3	0.2	2.8	25	0.5	17
394	1	39	0	1	72.5747792	3.34450944	21	300	9	3.8	9.6	53	38	31	1.2	1003	44	199	0.2	0.12	173	96	90	1.8	3.6	5.6	2.4	46	100	457	10	3.4	254	250	97	4.7	9	23	0	0.4	3.8	72	18	1.5	0.4	2.7	25	0.6	16
395	1	31	0	1	74.84274105	2.93951025	25	350	21	3.3	9.9	119	39	25	1	723	42	281	0.1	0.08	90	10	79	6.9	2.7	9.4	1.8	37	202	420	16	0.4	329	339	239	4.2	12	30	0	0.3	3.3	51	17	1.2	0.3	3.3	26	0.4	10.8
396	1	33	0	1	80.73944186	3.34450944	24	200	28	3.9	8.7	205	85	36	0.7	928	37	314	0.1	0.02	155	50	83	4.8	1.1	10.2	3.9	110	235	520	9.9999	0.7	323	366	168	4.7	12	81	0	0	3.9	48	20	1.3	0.3	3	16	0.4	14.4
397	0	34	1	1	97.52235955	3.29821921	29	325	52	4.3	16.5	72	83	33	1.3	940	46	323	0.1	0.14	106	248	102	3.4	5	11.4	13.8	128	212	838	19	1.1	311	384	205	6.9	13	58	0	0	4	44	29	1.2	0.3	3.2	25	0.4	7.7
424	0	46	0	0	67.58526313	2.81031696	24	150	66	3	13.2	235	38	34	0.7	1269	56	328	0.0999	0.02	84	14	72	11.5	0.9	7.2	4.5	44	134	388	24	0.5	264	403	180	3.7	12	23	0	0.2	3.8	46	24	1.6	0.3	2.7	25	0.6	11.1
426	0	41	0	0	78.15396535	2.751020304	28	920	70	3.5	9.5	209	73	39	0.5	836	53	353	0.1	0.05	75	51	90	5.7	1.4	9.1	5.6	71	117	395	20	0.3	261	421	186	2.5	14	27	0	0.1	3.8	47	19	2.3	0.4	2.1	18	0.3	17.1
428	0	48	1	0	75.20561495	2.56064004	29	415	14	3.3	7.5	56	53	70	0.5	1910	36	345	0.0999	0.12	9	3	79	6.9	2.5	12.3	8.4	79	122	351	9.9999	0.1	420	400	411	4.7	17	51	0	0.2	3.5	121	17	3.4	0.5	5.1	21	0.5	15
430	0	43	1	0	60.10098903	2.40064036	25	125	65	2.9	9	159	72	53	0.8	1251	32	238	0.1	0.18	62	17	59	3.1	2.9	6.1	6.8	81	91	372	12	0.3	302	279	240	2.6	7	62	0	0.2	3.5	65	17	1.6	0.2	2.2	18	0.3	28.3
432	0	42	1	0	65.77089365	2.81031696	23	150	52	2.3	12.9	182	83	49	0.7	915	50	263	0.1	0.03	76	38	47	4.7	1.1	4.8	3.4	70	189	558	17	0.5	186	323	110	2.9	8	41	0	0.1	3.8	92	34	2.4	0.4	4.7	33	0.3	11.3
434	0	42	0	0	76.20351816	2.725801	27	550	119	2.5	8.5	324	69	39	1.2	979	37	234	0.1	0.17	39	4	66	4.4	3.2	6.5	4.2	177	223	271	17	0.4	224	282	185	1.9	7	92	0	0.2	3.6	56	17	1.4	0.3	2.7	22	0.3	16.3
437	0	43	0	0	72.5747792	2.64257536	27	425	34	3.1	8.3	64	56	50	0.8	774	36	263	0.1	0.1	88	41	72	2	2	6.8	3.5	106	225	312	9.9999	0.5	264	308	176	1.9	9	50	0.1	0.2	3.9	104	21	1.8	0.5	5.3	17	0.6	14
438	0	46	0	0	80.28584949	2.81031696	28	450	18	3.5	14.4	185	31	48	0.9	1156	58	407	0.1	0.04	55	22	72	2.7	1.6	8.4	5.1	31	192	577	16	0.4	281	476	226	4.2	11	13	0	0.1	3.8	66	11	1	0.2	4.1	16	0.2	15.5
440	0	48	0	0	61.46176614	2.322576	26	250	51	3.8	13	306	55	39	0.6	1005	39	303	0.1	0.12	85	39	82	4	1.3	5.8	4.3	64	96	395	25	1.1	311	352	226	2.9	13	44	0	0.1	3.9	74	18	1.5	0.4	3	24	0.6	15
441	0	46	0	0	70.30681735	2.922116736	24	450	126	3.7	14.1	290	164	46	1	1297	56	326	0.0999	0.02	109	15	78	4	1	4.9	5.5	134	178	430	30	0.6	379	391	270	3.7	19	51	0	0	3.8	59	55	1.7	0.4	3.7	41	0.5	10
443	0	49	0	0	82.32701516	2.93951025	28	125	29	3.5	9.7	145	64	43	1	1158	63	417	0.1	0.09	40	20	70	3.1	1.6	10.2	3.9	176	94	472	22	0.4	303	493	263	4.2	8	63	0	0.2	4.1	46	26	1	0.3	2.9	24	0.4	10
444	0	48	1	0	64.86370891	2.52015625	25	525	51	3.8	14.4	187	123	33	0.9	1043	46	202	0.0999	0.02	82	39	89	8.1	1.3	7.8	7.7	181	226	383	12	0.4	282	264	200	3.1	10	74	0	0	3.8	32	20	1.9	0.4	3.6	18	0.5	14.3
470	0	42	1	1	72.25726454	3.20660649	22	975	98	2.5	8	92	76	40	1.3	426	107	604	0.1	0.09	48	96	58	14.3	2.4	15.9	5.8	56	177	493	13	0.3	234	741	186	2.8	8	34	0	0.1	4.3	63	54	1.2	0.2	3.5	34	0.9	11.4
471	0	44	0	1	75.52312961	2.922116736	25	530	40	2.9	19.8	153	83	43	1.2	729	64	342	0.1	0.01	93	226	72	9.2	0.7	12.6	5.4	223	224	658	31	0.7	225	428	132	3.9	11	102	0	0.2	3.9	53	38	1.7	0.3	3.4	21	0.4	13
475	0	44	0	1	87.08973504	3.161284	27	365	48	3.5	16.4	143	96	43	1.2	832	45	395	0.1	0.11	99	119	75	6.6	3.7	11	4.9	129	197	529	11	0.5	259	458	160	4.3	12	83	0	0.2	3.8	41	14	1.5	0.3	3.8	19	0.4	17.8
477	0	47	1	1	78.92507238	2.83592336	27	125	57	4.4	10.7	122	53	43	0.8	792	42	376	0.1	0.02	160	235	99	5.4	1	10.9	5.2	133	87	814	41	0.8	339	434	179	5.4	16	51	0	0.2	4.5	46	50	1.6	0.3	3.5	30	0.4	16.4
478	0	47	0	1	83.59707379	3.02725201	27	375	15	3.6	8.9	115	31	43	1.1	1348	38	344	0.1	0.07	53	54	99	5.5	2.5	10.5	23.1	36	350	331	10	0.5	321	398	268	6.3	13	19	0	0.1	3.8	70	27	2.1	0.8	4.4	22	0.3	15
479	0	41	1	1	97.97595192	3.25225156	30.15	1200	13	4.3	23.8	118	84	42	1.4	773	57	382	0.0999	0.06	87	112	77	5.4	1.6	8.6	11.8	70	268	825	12	0.6	358	453	271	5.4	13	38	0	0.1	4.6	67	31	2.4	0.4	4.7	39	0.4	12.2
480	0	46	1	1	85.27536556	3.07160676	27	710	29	3.2	18.2	70	37	44	1.9	666	55	289	0.1	0.18	83	329	77	6.8	3.7	6.7	6.1	110	92	721	19	0.7	262	358	179	6.2	8	57	0	0.1	4.2	79	122	1.6	0.4	3.6	67	0.5	14
483	0	42	1	1	82.10021897	3.02725201	27	690	12	3.6	8.4	94	30	45	1.1	1001	40	376	0.1	0.13	70	50	75	2	3.6	10.5	2.5	53	198	433	9.9999	0.6	335	429	265	4.8	7	27	0.1	0.1	4	54	94	1.8	0.2	6.9	52	1	8.2
484	0	40	0	1	70.30681735	2.98321984	23	900	7	3.3	12.4	29	30	31	1.3	663	35	111	0.1	0.03	148	73	80	1.9	1	7.3	5	27	167	606	15	0.6	328	155	180	6.2	8	22	0.1	0.2	3.1	52	18	2.6	0.8	5.7	22	0.6	12.5
485	0	46	0	1	83.91458845	3.07160676	27	275	18	3.7	5.9	50	24	29	0.7	1166	38	262	0.1	0.08	47	15	94	4.1	1.9	8.3	3.9	33	169	396	9.9999	0.5	386	312	339	7.3	12	18	0.2	0.1	3.6	54	17	2	0.4	4.4	21	2.3	11.1
487	0	41	0	1	86.63614267	3.34450944	25	600	6.9999	4.1	9.3	13	43	47	1	1532	40	414	0.1	0.07	142	432	89	1.7	1.3	9.2	4.2	51	80	448	9.9999	0.9	373	465	231	4.9	10	29	0	0.1	4.7	51	46	2.1	0.4	2	35	0.6	7
490	0	50	0	1	68.0388555	3.161284	21	400	49	3.9	12.8	245	98	33	1.1	967	6	92	0.1	0.02	84	32	73	0.1	1.1	1	4.2	76	163	475	10	0.6	281	99	197	4.8	12	34	0	0.2	4.3	69	17	1.8	0.7	4.9	20	0.4	13
491	0	42	0	1	92.07925111	3.25225156	28	450	41	3.7	6.3	75	21	30	0.9	423	69	401	0.2	0.08	150	111	82	5.3	2	8.9	0.9999	28	69	445	25	0.8	343	484	193	4.6	8	13	0	0.2	4.1	95	33	1.4	0.5	3.6	26	0.4	8.2
493	0	45	0	1	84.36818082	3.20660649	26	125	63	4	11.6	243	85	28	0.9	1018	60	339	0.1	0.01	59	128	90	5.4	1.1	7.7	2.9	145	158	508	13	0.7	290	412	231	5.5	16	61	0	0.2	4	49	42	2.1	0.3	3.7	33	0.4	14.4
522	0	53	0	0	66.22448602	2.64257536	25	550	54	3.8	25.2	273	83	47	1.3	1479	66	429	0.1	0.01	81	57	75	6.2	0.5	9.5	5.8	142	260	485	18	1.1	253	511	172	4.4	15	50	0	0.2	4.8	73	24	1.5	0.3	3.1	19	0.5	14
523	0	52	0	0	60.78137758	2.64257536	23	510	103	2.5	12.8	473	125	51	0.9	1093	40	332	0.1	0.04	33	7	69	8	0.8	7.8	5.8	23	201	514	19	0.3	310	388	277	2.3	12	56	0	0.1	3.5	49	17	2.2	0.5	4.4	23	0.3	12.9
525	0	59	0	0	66.36056373	2.52015625	26	225	34	3.3	10.8	160	19	48	0.4	1610	85	770	0.1	0.05	64	57	71	9	0.8	17.9	6	34	44	337	20	0.7	228	882	164	3.6	16	13	0	0.1	3.9	77	16	1.6	0.4	3.4	16	0.5	15.6
527	0	52	0	0	53.52389966	2.64257536	20	450	83	3.3	17.3	279	88	47	0.9	1186	3	14	0.2	0.08	56	45	65	1.3	1.2	2.2	5.4	128	156	304	21	0.9	263	21	207	2	15	64	0	0.1	4.5	84	18	1.6	0.2	3.4	21	0.2	8.8
528	0	51	0	0	58.51341573	2.464020878	23	875	61	3.6	11.8	229	61	37	1	1309	45	312	0.1	0.03	83	80	79	3.3	0.7	7.3	3.1	200	185	465	18	0.9	288	368	205	4.3	11	71	0	0.1	4.3	107	31	1.4	0.1	1.7	26	0.7	13.3
529	0	57	0	0	80.73944186	2.98321984	27	375	22	3.6	12.8	103	91	39	1.8	1088	47	365	0.0999	0.06	95	103	71	5.5	3.3	10.3	4.8	92	249	719	10	0.6	327	428	232	4.2	13	54	0	0.2	4.5	70	36	2.3	0.5	3.9	25	0.4	25
532	0	50	0	0	63.72972799	2.322576	27	20	51	4.3	14.7	141	70	65	1.5	1696	51	436	0.0999	0.1	87	47	83	2.5	2.9	13.9	10.2	74	377	673	19	0.6	376	503	289	7.5	16	38	0	0.5	4.3	77	33	1.5	0.4	2.7	29	0.2	22.2
534	0	59	1	0	65.31730128	2.89612324	22	350	79	3	9.9	346	150	35	0.8	804	41	408	0.1	0.04	54	118	63	2.2	0.9	9.5	4.4	73	190	698	17	0.3	262	461	208	3.1	10	35	0	0.1	4.2	59	20	1.5	0.4	3.3	24	0.6	24.3
537	0	53	1	0	63.04933943	2.52015625	25	50	39	2.9	7.4	82	24	51	0.7	689	73	236	0.1	0.11	45	41	58	5.3	2.1	10	0.9999	44	114	413	15	0.4	290	324	245	3.4	9	16	0	0.1	3.7	77	19	2.1	0.4	2.9	22	0.6	18.6
538	0	51	0	0	61.46176614	2.47999504	24	500	30	3	6.7	126	90	32	0.7	712	51	514	0.1	0.03	100	42	67	2.7	1.3	9.8	4.2	49	73	350	9.9999	0.7	203	578	103	3	7	24	0	0.3	3.9	44	18	2.1	0.7	3.9	20	0.6	12.9
539	0	51	0	0	58.64949344	2.20789881	26	525	141	2.8	10.6	363	105	41	1	533	53	372	0.1	0.02	66	8	64	2.2	1.9	7.4	3	156	224	304	9.9999	0.5	247	435	181	2.6	8	70	0	0.3	3.5	46	23	1.8	0.4	4.7	20	0.3	10
540	0	54	0	0	72.80157539	2.667407568	27	600	44	3.4	13	108	35	45	1	953	50	466	0.0999	0.12	84	72	87	3.4	1.7	12.4	7.6	51	156	463	30	0.4	290	532	206	3.7	13	19	0.1	0.1	4.2	78	16	1.7	0.6	6.9	19	0.8	23.3
541	0	58	0	0	63.5029318	2.322576	27	270	69	2.8	8.8	129	59	53	6.9	973	39	428	0.1	0.02	75	52	63	4.9	1.5	12.1	6.8	92	237	381	22	0.4	249	484	174	2.5	17	48	0	0.2	3.6	61	14	1.7	0.2	3.5	9	0.5	21.7
544	0	52	0	0	57.60623099	2.40064036	23	35	63	3	12	189	188	48	0.7	840	12	33	0.0999	0.02	32	79	74	3.9	2.1	3.6	5	78	148	435	18	0.2	336	53	304	2.2	11	37	0	0	4.1	63	22	1.1	0.3	0.9	28	0.5	12.5
545	0	55	0	0	66.67807839	3.07160676	21	550	85	4.2	13	395	90	45	1	1896	44	368	0.1	0.03	112	26	88	2.2	1.7	8.6	5.4	157	264	534	13	0.6	378	423	266	3.7	14	75	0	0.1	4.3	86	17	1.5	0.4	2.7	20	0.4	17.8
546	0	52	1	0	57.60623099	2.40064036	23	700	50	3.5	7.7	128	84	39	0.6	708	48	385	0.1	0.06	98	74	74	7	1.6	11.2	5.1	112	90	361	9.9999	0.5	274	451	176	3.2	16	37	0	0.1	4	77	19	1.3	0.3	2.8	23	0.5	12.9
548	0	59	1	0	66.67807839	3.07160676	21	830	95	3.7	20	406	134	34	1	1028	55	372	0.1	0.01	128	104	73	8.9	0.1	9.1	2.8	163	83	403	17	0.8	226	445	98	3.4	20	62	0	0	4.1	54	16	1.4	0.2	1.4	21	0.5	7.5
565	0	55	1	1	83.46099608	3.34450944	24	400	75	2.7	8.5	196	104	33	0.6	1067	44	349	0.1	0.12	59	41	80	5.3	2.1	10.6	2.9	102	134	308	16	0.4	221	409	162	5.1	14	77	0	0.2	3.5	73	27	1.6	0.4	1.8	23	0.5	13.3
566	0	52	1	1	93.89362059	3.233954822	29	875	59	3.8	8.9	386	85	34	0.8	1595	44	444	0.1	0.02	111	82	85	5	0.5	12	5.4	244	149	414	18	0.9	295	505	184	4.9	15	65	0	0.1	4.2	61	22	1.1	0.2	2.3	24	0.4	25
567	0	55	0	1	64.31939807	2.68402689	23	660	55	3.9	17	218	24	46	1.3	1507	53	377	0.1	0.0099	122	268	80	4.5	0.2	9.3	5.1	144	36	740	12	0.8	269	444	147	6.1	13	47	0	0.7	4.6	75	32	2.2	0.5	4.3	32	0.2	8.9
568	0	59	0	1	98.42954429	3.27979344	30.01	200	26	2.2	17.4	79	74	37	1.3	611	59	317	0.1	0.07	97	23	67	5.8	2	8.3	3.5	92	154	719	11	0.6	225	390	128	3.6	10	58	0	0.2	3.2	49	33	1.6	0.4	4.4	28	0.4	12.5
570	0	50	1	1	89.58449308	3.27979344	27	405	78	4	17.6	171	49	33	1.3	1183	43	303	0.0999	0.04	97	108	93	3.6	0.7	8.6	6.1	68	160	548	20	0.6	279	358	182	4.9	17	27	0	0.1	4.1	65	23	1.8	0.5	3.3	23	0.5	14.4
571	0	51	0	1	70.76040972	3.07160676	23	475	130	2.6	12.4	419	109	31	0.9	1569	52	473	0.2	0.04	112	52	54	7.5	1.2	17.1	3.6	229	295	479	22	1	181	550	69	3.4	10	79	0	0.1	4.2	85	22	1.9	0.3	1.7	36	0.5	12.5
572	0	57	1	1	81.6466266	3.34450944	24	90	18	3.7	17.9	46	55	39	4.1	1427	38	286	0.2	0.08	127	510	86	2.1	2.1	16.1	1.2	83	135	853	16	0.7	298	342	171	6.7	11	40	0	0.2	3.5	45	32	1.5	0.4	2.6	44	0.6	12
573	0	59	1	1	73.48196394	2.89612324	25	640	43	3	13.4	256	146	36	1.2	712	63	449	0.1	0.08	87	94	64	6.3	1.8	12.4	3.1	107	194	522	9.9999	0.6	241	531	154	3.5	9	49	0	0	4.1	66	27	1.5	0.5	7.2	28	0.1	18.9
574	0	51	0	1	63.04933943	2.89612324	21	400	19	3.2	8.7	76	52	35	1.1	729	60	519	0.1	0.12	35	22	80	2.8	3.3	15.3	3.5	76	289	449	10	0.4	245	597	211	4	11	45	0	0.1	3.7	64	12	1	0.7	6.2	18	0.4	15
577	0	56	0	1	78.24468383	3.07160676	25	500	22	3.5	10.1	87	105	29	1	770	50	371	0.0999	0.08	54	69	78	6.9	1.4	10.8	0.9999	65	179	404	16	0.6	266	439	212	4.6	11	25	0	0.3	3.9	73	20	3.8	0.6	4.2	22	0.5	12.5
578	0	56	0	1	85.27536556	3.34450944	25	450	18	3.7	8.7	25	9	32	0.9	1287	40	369	0.1	0.13	164	178	95	3.4	2.7	19.2	3.3	21	39	987	39	0.6	322	432	158	7.7	13	15	0.1	0.3	3.8	59	36	2.1	0.8	8.2	36	0.5	8.3
579	0	52	0	1	74.38914868	2.81031696	26	325	55	3.8	12.2	363	105	38	1.1	1145	57	429	0.0999	0.03	41	17	87	11.8	1	10.5	4.3	142	139	467	21	0.4	364	508	325	3.9	15	45	0	0.2	3.9	101	18	1.6	0.4	2.1	22	0.8	10
581	0	54	0	1	97.52235955	3.43805764	28	90	32	3.8	12.7	148	76	29	1	1055	51	318	0.1	0.07	96	106	95	5	1.9	8.5	4	143	147	528	26	1	292	383	196	6.6	13	71	0	0.1	4	55	21	1.5	0.3	2.4	22	0.4	13.3
582	0	56	1	1	81.19303423	3.07160676	26	400	36	4	45.9	253	60	55	2	627	62	471	0.1	0.04	69	57	75	2	1	10.9	9.1	113	174	772	68	0.5	388	546	319	4.9	11	57	0	0.4	4.2	59	46	1.5	0.5	3.1	32	0.5	16.7
583	0	51	0	1	88.90410452	3.48531561	25	175	51	3.9	10.2	202	52	44	0.6	672	51	310	0.1	0.03	62	24	86	3.9	0.8	7.7	3.9	59	129	547	17	0.6	382	373	320	5.8	14	28	0	0.4	4	112	40	1.5	0.5	5.8	37	0.3	16
584	0	57	1	1	89.58449308	2.965697294	30	225	31	3.4	11	94	49	26	1	658	41	323	0.1	0.07	69	196	89	2.2	2	6.1	4.3	81	220	468	17	0.8	267	372	198	4.2	15	46	0	0.1	3.7	56	21	1.3	0.4	4.6	18	0.6	20
585	0	50	0	1	72.5747792	3.25225156	22	125	17	3.7	8.6	112	97	33	0.8	1190	63	428	0.1	0.06	120	61	65	10.4	1.9	12.1	12	49	275	437	16	0.9	260	514	140	4.5	10	25	0	0.1	4.3	75	22	1.5	0.3	2	23	0.5	26.7
629	0	62	0	0	68.49244787	2.81031696	24	300	64	3.3	18.1	293	295	50	1.1	1485	65	440	0.1	0.02	123	161	70	6.7	0.6	11	9.4	228	166	519	18	0.4	294	523	171	4.1	17	72	0	0.1	3.9	51	12	2.3	0.3	3.9	20	0.4	17.1
630	0	63	0	0	72.9376531	2.544407814	28	17	149	2.9	23.2	203	117	56	1.7	1240	78	592	0.0999	0.02	82	79	60	8.3	1.2	13.7	6.9	142	223	785	43	0.6	282	692	200	3.6	16	48	0	0.2	3.9	45	15	1.7	0.5	3.3	18	0.2	18.6
631	0	68	0	0	82.55381134	2.81031696	29	400	70	3.2	26.3	155	78	57	1.2	1654	58	410	0.1	0.03	65	87	65	6	0.8	15.3	5.1	312	127	488	22	0.3	229	489	164	3.6	14	74	0.1	0.2	4.1	87	16	2.1	0.4	3.8	20	0.9	21.3
632	0	61	0	0	52.38991874	2.56064004	20	510	198	3.6	12.9	489	125	33	0.9	1727	52	418	0.1	0.07	79	75	87	10.1	1.5	9.5	3.8	134	179	593	27	0.6	294	490	215	2.5	12	48	0	0.1	4.2	90	25	1.5	0.3	2.7	29	0.9	12.5
633	0	67	1	0	55.79186151	2.345859824	23	275	12	3.5	9.5	353	74	46	1.6	1330	83	415	0.1	0.04	91	15	78	4.8	0.8	8.4	5.7	94	81	318	29	0.5	296	511	205	3.6	13	26	0	0.1	3.7	48	16	1.6	0.3	1.7	22	0.5	24.3
634	0	65	1	0	56.92584244	2.464020878	23	400	22	3.4	21.2	147	31	72	1.3	2332	46	377	0.0999	0.05	55	205	87	3.4	1.5	9.2	8	138	117	799	11	0.4	321	436	266	5.6	17	68	0	0.1	3.9	100	26	1.9	0.3	2.3	29	0.5	20
635	0	60	0	0	82.10021897	2.751020304	29	530	172	4	12.7	286	91	46	1.6	1197	36	378	0.1	0.05	58	140	75	1.7	2.2	9.9	22.9	160	171	545	19	0.4	268	426	210	4	12	52	0	0.2	4.1	52	14	2.1	0.3	5.8	16	0.4	12.5
636	0	67	0	0	62.50502859	2.504053056	24	375	130	3.4	37.7	922	117	44	1.5	1016	46	326	0.1	0.01	105	44	89	4.7	0.3	6.9	8.4	125	246	586	51	0.7	359	384	254	3.9	20	55	0	0.5	3.6	54	22	2.5	0.7	3	26	0.5	14.3
639	0	64	0	0	69.85322498	2.47999504	28	575	52	4.4	13.4	229	87	38	1.7	1440	41	396	0.1	0.08	92	30	94	3.4	1.9	9.2	15.6	146	185	556	13	0.7	340	450	248	3.9	16	67	0	0.9	4.3	69	23	2.1	0.4	2.3	24	0.6	12.5
640	0	68	1	0	61.23496995	2.98321984	20	700	138	4.2	20.8	1104	191	42	6.1	986	74	553	0.1	0.01	112	39	85	14	1.2	14.1	5.6	175	181	535	11	1	383	655	271	4.6	14	81	0	0.1	3.8	56	30	1.8	0.3	2.5	31	0.4	18.8
642	0	68	0	0	68.0388555	2.56064004	26	400	58	3.7	25.1	351	348	38	1.5	1368	38	404	0.1	0.02	102	151	92	3.2	0.7	8.9	6.9	135	161	507	31	0.7	296	454	194	3.5	15	52	0	0.1	3.8	80	18	1.4	0.3	2.9	21	0.5	13.8
643	0	63	0	0	65.99768984	2.85305881	23	590	52	3.6	16.3	434	92	53	0.6	1503	11	86	0.1	0.04	95	111	74	1.9	0.6	2.2	6	92	170	280	30	0.7	290	101	195	3.6	13	40	0	0.2	4.1	73	37	1.9	0.3	2	31	0.5	12.2
667	0	63	1	1	87.99691978	3.161284	27	350	38	4.4	9.2	70	68	34	1.1	871	57	411	0.1	0.04	94	70	131	5.4	1.4	12.3	3.9	90	102	423	17	0.8	384	486	290	7.4	12	53	0	0.1	4.2	82	38	1.5	0.5	2.9	28	0.5	20
670	0	69	1	1	89.81128926	3.02725201	29.6	420	34	4	31.3	420	100	45	2.8	1554	33	375	0.2	0.01	115	73	83	1.8	0.3	8	5.2	170	291	571	20	1.4	347	418	232	5.1	14	57	0	0.5	4.3	57	26	1.6	0.4	2.1	26	0.4	16.7
671	0	63	0	1	78.47148001	3.20660649	24	0	95	2.6	15.3	361	165	43	1.7	708	53	611	0.1	0.05	56	49	66	10	2.5	13.8	0.9999	189	250	520	16	0.6	234	688	178	3.3	13	69	0	0.4	3.9	70	16	3.5	0.8	5	17	0.5	17.5
672	0	61	1	1	80.96623805	3.05382615	26	390	32	3.8	17.1	225	74	35	1.1	938	85	307	0.0999	0.03	66	46	81	19.9	0.7	10	2	69	141	446	16	0.3	338	422	272	4	9	37	0	0.1	4	73	40	1.8	0.3	4.7	61	0.3	7.8
673	0	63	1	1	81.19303423	3.11628409	26	550	31	4.3	19.3	605	61	33	0.7	1013	52	498	0.1	0.02	47	10	96	10.7	0.6	14.7	3.4	100	267	474	14	0.7	374	575	327	5	15	48	0	0.1	4	69	21	1.3	0.5	3.4	19	0.5	11.1
674	0	65	1	1	97.74915574	3.29821921	29	75	49	3.8	12.8	150	48	38	0.9	1145	43	432	0.0999	0.09	96	172	94	2.2	1.7	10.7	0.9999	67	264	526	21	0.6	290	488	194	4.2	12	28	0	0.2	4.1	58	36	1.9	0.6	4.4	26	0.6	25.6
675	0	69	1	1	83.91458845	2.81031696	29	350	22	4.4	14.1	90	55	40	1.6	1524	40	447	0.1	0.01	105	127	90	3.6	1	10.5	4.6	167	78	552	27	0.8	318	501	213	6.4	10	50	0	0.3	4.4	58	34	1.3	0.3	2.6	30	0.7	22.7
676	0	61	0	1	92.3060473	3.098374448	29	875	59	4.3	39.2	193	75	37	2.3	824	52	378	0.1	0.01	103	194	92	7.7	0.6	15.1	5.3	120	187	536	21	1.2	290	453	187	6.4	12	27	0.1	0.2	4.4	50	34	1.7	0.7	3	37	1.1	14.6
678	0	60	0	1	83.46099608	3.02725201	27	120	34	3.6	25.7	151	68	38	1.9	1059	29	330	0.2	0.02	118	384	88	3.7	0.7	11.2	5.8	193	402	639	13	1.5	275	374	157	7.4	13	62	0	0.2	3.8	66	16	1.4	0.5	2.5	21	0.8	20
681	0	69	1	1	76.65711053	2.81031696	27	700	33	3.9	12.7	105	31	37	1.1	894	55	397	0.1	0.06	92	78	85	5	1.6	14.7	0.9999	60	187	480	11	0.8	328	472	236	4.8	11	25	0	0.1	4.2	80	37	1.2	0.4	2.7	26	0.4	12
682	0	65	1	1	75.29633342	3.25225156	23	325	241	4.1	15.4	1507	299	37	1	949	55	304	0.1	0.02	101	57	81	7.3	0.5	9.8	1.7	313	125	403	31	1.1	279	376	178	3.7	15	94	0	0	4.3	50	19	1.6	0.6	4.3	22	0.3	30
683	0	69	0	1	77.92716917	3.07160676	25	55	23	3.6	9	40	110	36	1.7	953	43	464	0.1	0.11	120	202	92	6.4	2	13.6	6.1	115	10	605	24	0.6	260	527	140	5.9	12	77	0	0.2	3.9	83	19	1.2	0.4	3.7	27	0.6	13.6
684	0	67	1	1	65.77089365	2.81031696	23	450	41	4.1	24	305	81	40	1.5	1201	40	410	0.0999	0.04	91	118	93	3.2	0.6	10.8	0.9999	96	189	608	21	0.7	343	464	252	4.6	15	55	0	0.1	4.3	129	20	1.6	0.3	1.9	26	0.3	17.8
685	0	65	1	1	86.63614267	3.161284	27	400	19	3.2	18.8	100	67	43	1.8	613	66	485	0.0999	0.06	65	350	69	4.6	3	9.3	10.2	117	212	603	52	0.4	247	565	182	4.7	10	69	0	0.2	4	58	28	1.3	0.4	3.4	18	0.5	23
686	0	69	1	1	85.72895793	3.25225156	26	600	17	3.7	16.7	60	66	26	1.3	564	50	263	0.1	0.04	82	78	91	4.8	1	6.4	4.1	78	126	512	25	0.6	260	324	178	6	13	27	0	0.2	3.8	50	23	2	0.4	3.3	24	0.7	11.8
687	0	69	1	1	75.74992579	2.85305881	26	950	27	4.1	34.4	400	154	42	3	1155	32	360	0.0999	0.03	53	82	96	3.2	0.7	8.9	4.5	300	188	565	75	0.7	292	404	239	7	15	177	0	0.1	3.8	49	27	2.2	0.7	6.5	30	0.4	16.9
688	0	68	0	1	94.34721296	3.34450944	28	120	14	3.6	9.1	83	34	35	0.7	880	58	416	0.1	0.02	48	138	79	8.1	0.6	11.5	2.9	76	141	334	11	0.6	248	494	200	4.3	11	31	0	0.4	3.7	47	17	1.1	0.3	4.1	19	0.5	21.3
689	0	61	0	1	77.1107029	2.93951025	26	450	78	3.3	22.9	320	135	32	2	884	34	465	0.1	0.02	91	60	81	1.8	0.4	7.7	2.9	212	183	400	18	0.7	230	509	139	5.4	14	88	0	0.2	3.7	60	17	2.2	0.7	3.5	21	0.5	12.5
690	0	67	0	1	97.97595192	3.39112225	28	425	223	4.6	9.6	587	62	34	0.6	986	59	379	0.2	0.04	84	21	90	8.1	0.7	12.8	3.1	129	136	358	22	0.9	391	459	307	5.4	16	32	0	0.5	4	46	30	0.8	0.5	3.3	37	0.4	15
691	0	60	1	1	88.45051215	3.161284	27	650	55	4.1	7.7	173	86	26	0.6	753	53	391	0.2	0.08	52	18	90	6.3	2.3	12.2	2.4	52	133	385	9.9999	1.1	297	463	245	5.3	12	28	0	0.1	4	61	41	1.4	0.2	2.9	28	0.6	7.5
693	0	60	1	1	74.38914868	2.93951025	25	325	79	4.3	10.3	268	69	41	1.2	1398	54	310	0.1	0.05	65	154	114	4.2	0.7	8.4	6.5	141	174	575	15	0.6	349	377	284	6	14	44	0	0.1	4	75	34	1.7	0.5	4.7	28	0.6	33
694	0	69	0	1	91.62565874	3.25225156	28	65	29	4.2	10.2	137	151	49	1.3	838	66	412	0.1	0.09	101	186	111	2.1	2.4	15.7	5.9	98	183	516	17	1.5	317	496	216	5.6	16	52	0	0.5	4	61	23	1.2	0.7	7	22	0.3	15.5
695	0	68	1	1	76.65711053	3.07160676	24	80	60	3.5	23.9	328	57	39	2.6	1854	35	337	0.2	0.03	62	25	79	1.5	0.6	5.3	7.5	63	119	661	32	0.9	317	379	255	5.1	24	26	0	0	3.7	65	23	0.6	0.3	2.8	23	0.4	17.5
696	0	66	1	1	75.97672198	3.161284	24	625	52	3.9	20.2	134	69	36	1	1478	23	288	0.1	0.04	77	47	98	2	0.9	7.1	6.5	135	185	629	17	0.8	296	320	219	5.3	19	43	0	0.2	3.7	60	22	2	0.5	2.9	25	0.4	15
697	0	69	1	1	78.92507238	3.11628409	25	375	35	3.7	14.3	152	97	39	1	1139	62	328	0.1	0.1	77	89	85	7.2	3.9	14.1	5.4	96	266	522	16	0.7	250	411	173	6.9	17	40	0	0.4	4	71	14	1.3	0.7	4.8	23	0.6	10.8
709	0	79	1	0	52.16312255	2.40064036	21	100	41	3.2	9.6	180	92	33	1	1406	42	430	0.2	0.04	58	144	71	6.2	2	11.3	6.5	74	154	389	9.9999	0.6	223	490	165	4.2	12	45	0.1	0.1	3.8	126	13	1.3	0.3	4.8	22	0.9	28.6
710	0	75	1	0	60.10098903	2.56064004	23	320	53	3.1	21.6	306	73	43	0.9	1412	56	411	0.1	0.03	32	15	72	5.1	1	10.7	6.4	56	119	582	17	0.5	267	483	235	4	14	29	0	0.1	3.8	36	18	1.5	0.3	5.4	21	0.6	15
712	0	72	0	0	55.79186151	2.76789769	20	600	27	3.5	9.4	112	54	36	0.8	1429	30	284	0.1	0.11	64	26	85	1.6	2	7.1	18.6	69	140	295	13	0.3	285	323	221	3.4	28	30	0	0.2	3.5	58	10	1.7	0.4	3.8	17	0.6	17.1
713	0	71	1	0	64.41011654	2.40064036	26	350	19	3.7	30.3	59	41	45	1.6	1313	49	426	0.1	0.02	92	50	90	5.2	0.5	11.8	7	51	219	634	53	0.4	325	492	233	6.4	18	17	0	0.2	4	46	31	2.1	0.5	3.7	28	0.3	21.3
714	0	72	0	0	62.14215469	2.56064004	24	220	46	2.8	7.3	141	46	46	0.5	840	77	318	0.2	0.04	30	23	69	6.9	1.6	15.3	4.1	45	130	450	11	0.6	264	417	234	4.3	6	23	0	0	3.5	71	17	0.7	0.6	5.2	22	0.3	14.2
715	0	75	0	0	66.22448602	2.52015625	26	60	56	2.8	13.9	205	91	52	0.9	973	45	286	0.1	0.12	61	75	66	4.4	2.2	5.6	6.8	54	94	481	20	0.3	277	341	216	3.6	12	22	0	0.1	4	84	23	1.4	0.3	4.3	31	0.6	16.7
716	0	70	1	0	62.82254325	2.751020304	22	680	149	3.3	26.4	721	143	41	1.2	1076	37	241	0.0999	0.01	89	65	77	6.5	0.3	6.6	2.7	97	295	488	26	0.6	254	291	165	2.6	17	48	0	0.4	3.7	71	18	2.1	0.3	3.8	25	0.5	25
717	0	76	0	0	60.78137758	2.47999504	24	215	75	3.9	45.6	641	177	45	1.4	1595	41	409	0.0999	0.01	110	109	87	3.7	0.4	9.5	7.5	153	76	723	116	0.4	280	463	170	5.1	14	66	0	0.3	3.9	54	22	2.8	0.3	2.3	27	0.7	28.9
718	0	73	1	0	53.52389966	2.42431128	22	175	34	3.6	23.3	256	73	38	1.3	1598	37	327	0.1	0.03	98	40	81	3.8	0.6	9.1	5.1	209	164	378	32	0.3	283	377	185	2.7	17	87	0	0.1	3.7	48	17	1.4	0.3	2.1	22	0.5	30
720	0	72	1	0	62.14215469	2.793310542	22	175	35	4.2	10	124	50	52	1.1	1887	29	440	0.1	0.04	89	94	102	3.5	1.5	12.7	4.3	63	40	363	18	0.6	337	485	248	5.6	16	26	0	0.2	4.1	105	12	1.4	0.3	5.4	20	0.4	15.6
721	0	71	0	0	75.43241113	2.42431128	31	475	104	3.6	16.9	376	167	39	1.2	1179	54	423	0.0999	0.14	82	67	71	5.3	2.2	9.9	3.5	81	181	572	18	0.5	282	492	200	4	15	32	0	0.1	3.8	75	22	1.6	0.4	2.4	31	0.7	17.8
722	0	77	0	0	57.60623099	2.322576	24	400	62	3.9	20.8	321	151	34	1.2	1150	49	398	0.1	0.04	64	61	80	6	0.8	13.5	4.5	233	111	563	21	0.4	272	467	208	5.7	14	111	0.1	0.1	3.9	64	24	2.8	0.4	3.2	23	0.8	13
724	0	78	0	0	47.17360648	2.322576	20	525	48	3.1	17.4	667	59	45	0.8	1133	50	324	0.1	0.03	76	16	71	5.1	0.7	7.7	7.3	88	78	602	33	0.2	285	387	209	4.2	17	31	0	0.1	3.5	51	17	1.5	0.6	4.3	24	0.7	15
725	0	77	0	0	73.02837157	2.44015641	29	105	41	3.3	13.1	181	80	36	1.3	1090	36	307	0.1	0.07	135	75	83	5.1	1.5	6.7	3.9	83	119	458	19	0.5	261	355	126	5.2	12	42	0	0.2	3.7	66	17	1.4	0.3	2.6	27	0.8	16.3
726	0	78	0	0	59.87419284	2.345859824	25	125	36	3.2	16.5	203	102	71	0.9	2088	46	352	0.0999	0.04	107	15	77	1.3	1.2	8.6	7	79	79	576	33	0.3	271	408	164	3.2	16	26	0.1	0.1	3.5	97	16	1.7	0.5	3.8	17	1	21.7
727	0	78	0	0	67.58526313	2.44015641	27	500	247	4	18	823	196	33	1.5	1038	34	446	0.1	0.02	119	56	89	3.4	0.7	7.7	4.3	169	213	472	20	0.6	327	491	208	4.4	17	52	0	0.2	4.1	54	17	1.8	0.4	2.3	20	0.7	18.3
729	0	78	0	0	61.46176614	2.47999504	24	175	40	3.7	23.3	554	215	33	2.3	800	59	457	0.0999	0.02	77	139	95	4.7	0.4	13.6	4.9	568	43	477	20	0.6	311	534	234	4.5	21	134	0	0	3.8	68	21	0.8	0.3	3.1	24	0.1	22
731	0	77	0	0	57.83302718	2.64257536	21	50	20	3.9	10.5	76	30	46	1.4	1466	37	272	0.1	0.18	110	119	91	1.9	3.9	9.2	7	63	83	467	14	0.6	366	320	256	4.7	6	32	0	0.1	4	82	14	1.8	0.6	4.5	18	0.6	15
732	0	70	0	0	54.88467677	2.56064004	21	575	169	3.8	15.3	1109	410	39	1.4	1323	28	285	0.1	0.01	138	25	86	5.7	0.3	9.4	5.2	206	236	326	9.9999	0.8	309	328	171	2.8	16	70	0	0.1	3.9	50	18	1.2	0.3	2.5	26	0.6	25
735	0	70	1	0	71.21400209	2.60144641	27	350	120	3.6	14.5	402	134	44	1.3	1455	42	355	0.2	0.13	60	123	100	3.8	1.8	8.3	2.4	185	130	447	20	0.7	289	409	229	4.5	16	55	0	0.1	3.7	79	29	1.4	0.6	5.5	29	0.3	20
736	0	77	1	0	58.51341573	2.60144641	22	400	61	3.8	11.1	160	123	53	0.8	1357	35	406	0.1	0.09	103	15	87	3.5	2.6	11.6	7.1	138	141	577	15	0.6	408	456	305	4	18	39	0	0.4	3.8	58	19	2.1	0.3	2.9	21	0.4	18.6
737	0	79	1	0	64.41011654	2.56064004	25	90	41	3.5	19.1	193	29	47	1.4	1269	56	531	0.1	0.05	100	172	92	4.9	1.2	15	6.9	102	43	488	41	0.6	273	607	173	4.1	18	34	0.1	0.2	3.8	69	23	1.7	0.6	5.3	29	0.9	14.4
739	0	70	1	0	67.13167076	2.56064004	26	300	45	3.3	10.6	135	72	34	1.4	1010	44	308	0.0999	0.12	80	118	72	4.1	4.2	11.6	3.6	94	167	470	14	0.5	253	368	173	4.3	12	46	0	0.1	3.7	71	32	1.6	0.5	5.5	30	0.4	14
757	0	76	0	1	64.18332036	2.81031696	22	200	71	3.8	32	1340	221	52	1.2	1427	47	443	0.1	0.02	46	76	80	4.9	0.5	9	8.6	175	201	657	67	0.7	272	504	226	5	15	69	0	0.5	4.1	69	16	1.3	0.5	5.1	26	0.3	12.2
758	0	71	1	1	79.83225712	3.34450944	23	100	88	3.1	15.9	210	46	46	1.3	936	91	513	0.2	0.08	151	30	65	6.9	3.1	12.5	3.8	73	100	568	18	1	297	623	146	3	10	42	0	0.1	4.8	78	19	1.1	0.3	3.4	24	0.5	19.1
766	0	75	1	1	66.45128221	3.07160676	21	300	57	3.7	9.1	194	122	35	0.8	1173	42	518	0.2	0.12	86	86	87	4.1	3.4	15.6	3.9	76	145	672	9.9999	1	286	580	200	6.1	16	30	0	0.1	3.7	51	17	1.3	0.4	2.2	23	0.6	14.6
767	0	76	1	1	72.5747792	2.81031696	30	280	29	3.4	14	278	129	40	1	678	10	298	0.1	0.07	69	38	72	1	1.5	8.4	5.3	102	196	537	17	0.6	279	317	210	4.1	12	36	0	0.1	4.2	54	31	1.4	0.6	4.6	35	0.3	13.3
768	0	73	1	1	86.1825503	3.02725201	22	450	47	3.5	35.2	380	48	36	1.5	978	53	421	0.1	0.01	72	91	87	1.5	0.4	11.3	4.2	191	48	634	22	0.8	243	487	171	6.9	13	63	0	0.2	3.5	38	23	2	0.5	2.7	26	0.7	10
769	0	72	1	1	69.39963261	2.89612324	23	475	68	3.4	16.3	264	42	54	2.3	944	65	490	0.1	0.01	111	108	76	7	0.5	16.6	7.1	80	157	651	18	0.5	258	579	147	4.9	14	27	0	0.2	4.1	69	30	1.4	0.3	2.3	41	0.5	9.2
770	0	70	1	1	74.84274105	2.725801	27	195	91	4.5	10.1	433	137	28	1	1009	51	384	0.2	0.03	99	102	111	3.6	0.6	9	4.3	89	309	452	15	0.8	291	448	192	6.5	13	31	0	0.1	4.1	71	30	1.6	0.5	3.9	27	0.3	17.5
772	0	74	1	1	78.92507238	2.85305881	27	40	39	3.7	16.1	115	108	49	1.9	1553	30	316	0.1	0.02	68	128	94	1.8	0.9	7.7	4.9	82	62	637	22	0.7	262	356	194	6.3	14	36	0	0.1	3.7	71	26	1.4	0.5	3.2	25	0.4	12.2
773	0	71	0	1	64.86370891	2.85305881	22	70	128	4	14.3	439	187	37	0.6	1210	21	318	0.1	0.01	129	47	89	3.1	0.3	8.6	5.7	118	64	653	33	0.6	319	351	190	6.4	17	37	0.1	0.1	3.7	65	26	1.7	0.3	3.6	25	0.9	22
774	0	79	0	1	81.6466266	3.25225156	25	200	110	4.1	21.5	599	83	45	1.5	1131	45	360	0.2	0.01	126	98	78	11.1	0.3	11	2.1	131	152	456	18	1.2	262	427	136	4.8	15	64	0	0.1	4	74	21	1.5	0.6	3.8	29	0.4	13
775	0	75	1	1	76.20351816	3.07160676	24	90	59	3.9	18.4	284	63	44	1.2	1387	37	373	0.1	0.03	113	428	115	5.7	0.5	8.5	6.7	147	168	1025	22	0.6	315	424	202	6.3	20	53	0	0.2	4.1	41	17	1.3	0.4	2.8	20	0.9	16.4
780	0	76	0	1	81.19303423	3.161284	25	250	47	3.8	14.6	188	141	33	1	1018	42	391	0.1	0.08	78	155	101	5.6	2	12.6	4.9	93	118	419	16	0.4	228	451	150	5.1	14	32	0	0.1	4.3	92	19	0.8	0.3	2.1	26	0.5	13
[truncated: 52 more columns]
